# Supplementary material for: No Evidence for Contagious Yawning in Juvenile Ravens (Corvus corax): An Observational Study
Source: MDPI journal article supplement (doi:10.3390/ani12111357), 2022-05-26
Supplement: s1 [file s1]

**Table S1.** Random effects from the Generalized Linear Mixed Model

|                    |             |           |           |
|--------------------|-------------|-----------|-----------|
| <b>Yawning:</b>    |             |           |           |
| Groups             | Name        | Variance  | Std.Dev.  |
| BIRD:GROUP         | (Intercept) | 0.000000  | 0.00000   |
| GROUP              | (Intercept) | 0.002006  | 0.04479   |
| <b>Stretching:</b> |             |           |           |
| Groups             | Name        | Variance  | Std.Dev.  |
| BIRD:GROUP         | (Intercept) | 0.009198  | 0.09591   |
| GROUP              | (Intercept) | 0.017949  | 0.13397   |
| <b>Scratch:</b>    |             |           |           |
| Groups             | Name        | Variance  | Std.Dev.  |
| BIRD:GROUP         | (Intercept) | 3.526e-03 | 5.938e-02 |
| GROUP              | (Intercept) | 2.354e-10 | 1.534e-05 |
| <b>Shake:</b>      |             |           |           |
| Groups             | Name        | Variance  | Std.Dev.  |
| BIRD:GROUP         | (Intercept) | 0.01919   | 0.1385    |
| GROUP              | (Intercept) | 0.01825   | 0.1351    |

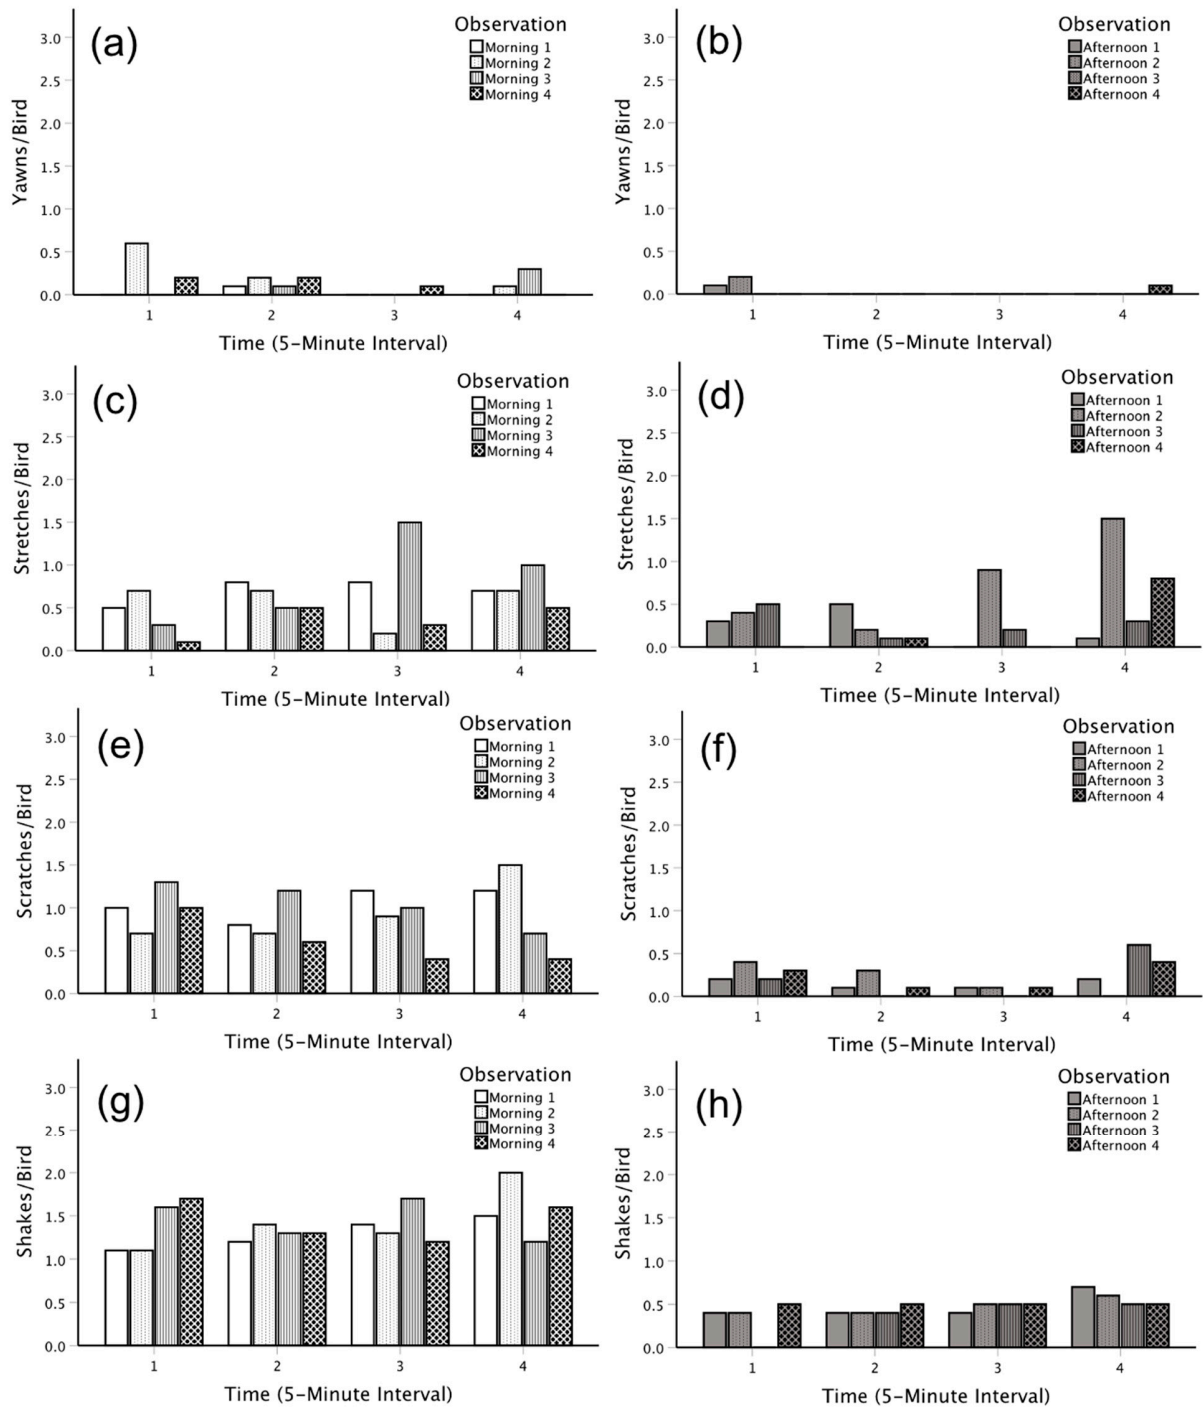

**Figure S1.** The temporal distribution of (a,b) yawning, (c,d) stretching, (e,f) scratching, and (g,h) shaking across the two 20-minute morning and two 20-minute afternoon observation periods depicted within 5-minute intervals.

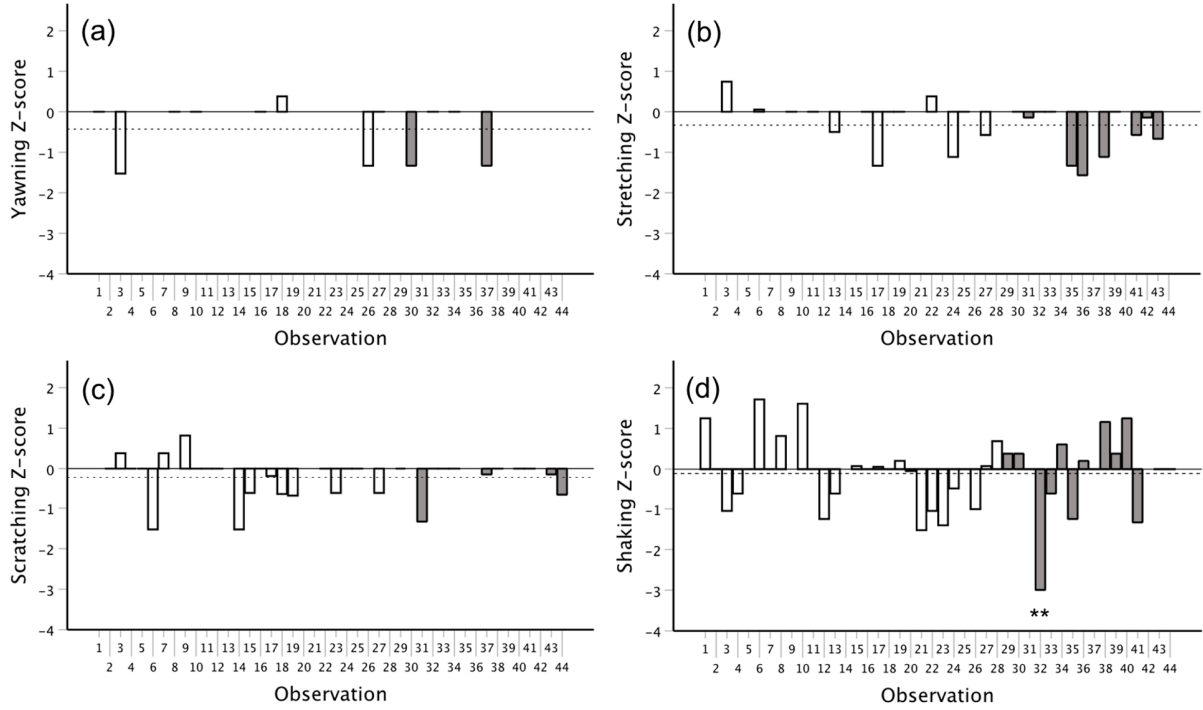

**Figure S2.** The distribution of Z-scores from the 60-second runs test analyses for (a) yawning, (b) stretching, (c) scratching, and (d) shaking across all morning (white) and afternoon (gray) observations. For yawning, 0/12 runs tests were significant; combined probability test ( $X^2(24) = 15.053$ ,  $p = 0.919$ ). For stretching, 0/24 runs tests were significant; combined probability test ( $X^2(48) = 23.583$ ,  $p = 0.998$ ). For scratching, 0/31 runs tests were significant; combined probability test ( $X^2(62) = 23.526$ ,  $p = 0.999$ ). For shaking, 1/41 runs tests were significant; combined probability test ( $X^2(82) = 66.967$ ,  $p = 0.885$ ).

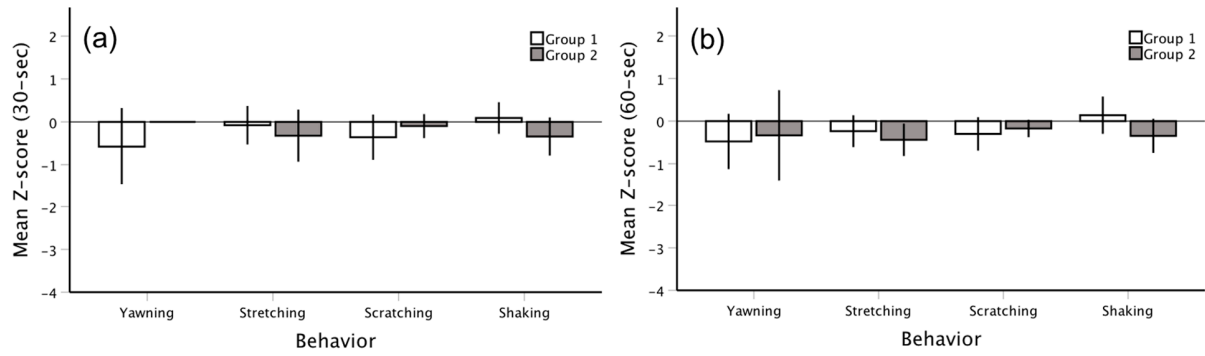

**Figure S3.** The mean Z-scores from the 30- (a) and 60-second (b) runs test analyses between Group 1 and Group 2. The level of temporal clustering did not vary as a function of group compositions. Note:  $M \pm 95\%$  CI; all  $p$ -values  $> 0.05$ .

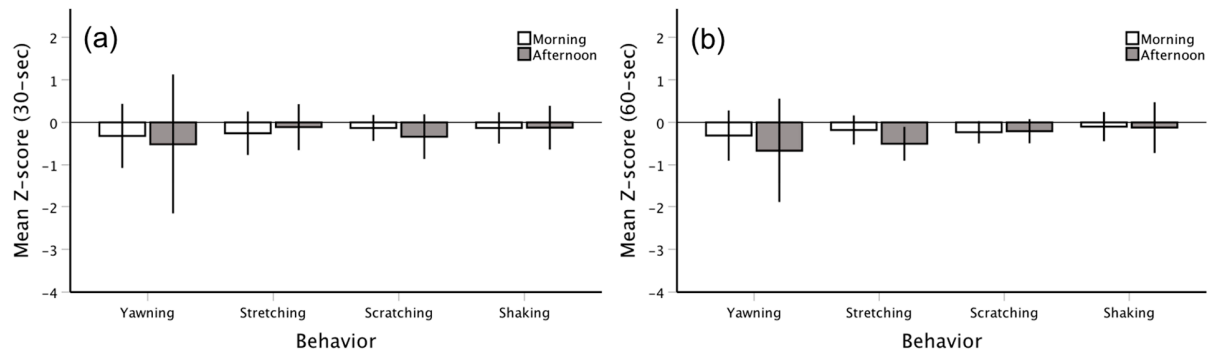

**Figure S4.** The mean Z-scores from the 30- (a) and 60-second (b) runs test analyses between morning and afternoon observations. The level of temporal clustering did not vary as a function of the time of the observations. Note:  $M \pm 95\%$  CI; all  $p$ -values  $> 0.05$ .
